# Supplementary material for: A pillar[5]arene-based 3D network polymer for rapid removal of organic micropollutants from water
Source: Royal Society of Chemistry journal article supplement (doi:10.1039/c7ta08894a), 2017-01-01
Supplement: c7ta08894a5.pdf [file c7ta08894a5.pdf]

## Electronic Supplementary Information (14 pages)

### **Pillar[5]arene-based 3D network polymer for rapid removal of organic micropollutants from water**

Bingbing Shi,<sup>†</sup> Hanxi Guan,<sup>†</sup> Liqing Shangguan, Hu Wang, Danyu Xia, Xueqian Kong\* and Feihe Huang\*

State Key Laboratory of Chemical Engineering, Center for Chemistry of High-Performance & Novel Materials, Department of Chemistry, Zhejiang University, Hangzhou 310027, P. R. China

Email: fhuang@zju.edu.cn and kxq@zju.edu.cn

#### **1. Materials and instrumentation**

All reagents were commercially available and used as supplied without further purification. Solvents were either employed as purchased or dried according to procedures described in the literature.

Solid-state nuclear magnetic resonance (NMR) spectra were recorded on a BRUKER 400WB AVANCE III spectrometer ( $B_0 = 9.4\text{T}$ , Larmor frequency 400.13 MHz for  $^1\text{H}$ , 100.61 MHz for  $^{13}\text{C}$ , 40.54 MHz for  $^{15}\text{N}$ ) with an  $^1\text{H}$ - $^{13}\text{C}$ - $^{15}\text{N}$  triple resonance 3.2 mm probe at room temperature. The magic-angle-spin (MAS) frequency was set to 12–17 kHz.  $^{13}\text{C}$  cross-polarization at magic-angle-spin (CPMAS) NMR spectra were performed by using a  $90^\circ$  pulse length of 2.29  $\mu\text{s}$ , 2 ms contact time, 2–10s recycle delay (40s recycle delay for **PPD**) with 5000 to 10000 scans.  $^{15}\text{N}$  cross-polarization at magic-angle-spin (CPMAS) NMR spectra were recorded at the same condition but more scans. All the 2D  $^{13}\text{C}$ - $^1\text{H}$  correlation experiments were acquired using 10 ms mixing time in order to obtain intermolecular interaction.  $^{13}\text{C}$  chemical shifts were referenced directly to adamantane ( $\delta(\text{CH}_2) = 38.5\text{ ppm}$ ) and  $^{15}\text{N}$  chemical shifts were measured relative to Glycine ( $\delta(\text{NH}_2) = 34.35\text{ ppm}$ ).

Fourier transform infrared spectroscopy (FT-IR) spectra were recorded on a Thermo Nicolet iS10 spectrometer. Transmission electron microscopic investigations were carried out on a HITACHI HT-7700 instrument.

Scanning electron microscopy investigations were carried out on a JEOL 6390LV instrument. Elemental analyses were carried out on an EA1112 instrument.

Thermogravimetric Analysis (TGA) was carried out on a DSCQ1000 Thermal Gravimetric Analyzer.

Surface area measurements were conducted on a BELSORP-Max Accelerated Surface Area and Porosimetry Analyzer. The sample (91.3 mg) was degassed at 100 °C for 12.0 h and then backfilled with N<sub>2</sub>. N<sub>2</sub> isotherms were generated by incremental exposure to ultra high purity nitrogen up to 1.0 atm in a liquid nitrogen bath (77.0 K), and surface parameters were determined using BET adsorption models included in the instrument software (BELSORP-Max).

UV-vis spectra were taken on a PerkinElmer Lambda 35 UV-vis spectrophotometer.

## 2. Synthesis of P5 and quantitative <sup>13</sup>C CPMAS NMR spectrum of the P5-P

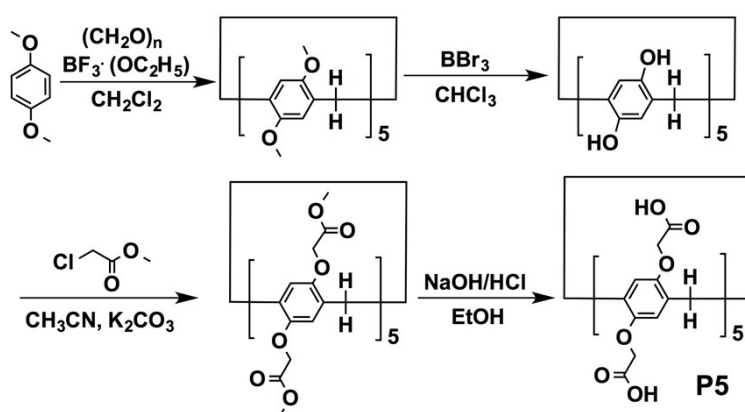

**Scheme S1** The synthetic route of compound **P5**.

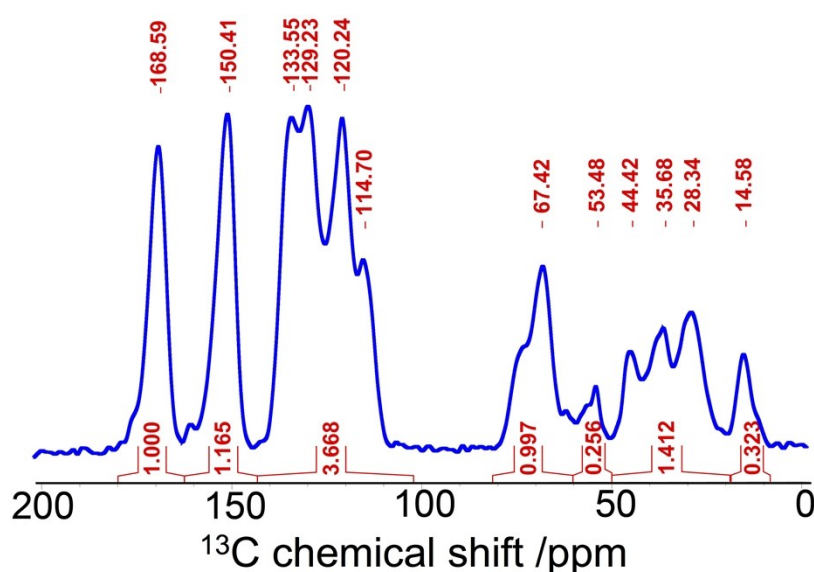

**Fig. S1** Quantitative <sup>13</sup>C CPMAS NMR spectrum of the **P5-P** polymer. The peaks of the spectrum are assigned and the integrals of the peaks are labeled.

### 3. SEM sample preparation

SEM samples were prepared by dispersing 2.00 mg of polymer **P5-P** in 10.0 mL of DMF and adding the suspension to the wafer *via* the vacuum freeze-drying methodology.

### 4. TEM sample preparation

TEM samples were prepared by dispersing 2.00 mg of polymer **P5-P** in 10.0 mL of DMF and adding the suspension to the copper mesh *via* the vacuum freeze-drying methodology.

### 5. Elemental analysis

|     |   |      |           |            |        |        |        |       |       |       |
|-----|---|------|-----------|------------|--------|--------|--------|-------|-------|-------|
| (a) |   | Name | Weigth    | Method     | N Area | C Area | H Area | N %   | C %   | H %   |
|     | 1 | P5-P | 1.9330 mg | 2mgChem80s | 6 016  | 20 781 | 7 773  | 10.43 | 51.40 | 5.849 |
|     | 2 | P5-P | 1.9340 mg | 2mgChem80s | 5 953  | 20 708 | 8 367  | 10.31 | 51.19 | 6.093 |

  

|     |   |      |           |            |        |        |        |       |       |       |
|-----|---|------|-----------|------------|--------|--------|--------|-------|-------|-------|
| (b) |   | Name | Weigth    | Method     | N Area | C Area | H Area | N %   | C %   | H %   |
|     | 1 | P5-P | 1.9180 mg | 2mgChem80s | 5 714  | 23 366 | 8 349  | 10.19 | 58.06 | 6.140 |
|     | 2 | P5-P | 1.9530 mg | 2mgChem80s | 5 787  | 23 539 | 8 503  | 10.13 | 57.44 | 6.146 |

  

|     |   |      |           |            |        |        |        |       |       |       |
|-----|---|------|-----------|------------|--------|--------|--------|-------|-------|-------|
| (c) |   | Name | Weigth    | Method     | N Area | C Area | H Area | N %   | C %   | H %   |
|     | 1 | P5-P | 1.9230 mg | 2mgChem80s | 6 028  | 22 802 | 8 421  | 10.25 | 57.21 | 6.081 |
|     | 2 | P5-P | 1.9460 mg | 2mgChem80s | 5 790  | 22 431 | 8 604  | 10.18 | 58.15 | 6.230 |

**Table S1** Elemental analysis data of polymer **P5-P** at different reaction times: (a) 72.0 hours; (b) 96.0 hours; (c) 120 hours.

Elemental analysis was used to track the polymerization reaction progress to determine the optimal reaction time for the preparation of the 3D network polymer. As shown in Table S1, the content of carbon element in the polymer **P5-P** remained constant after the reaction was carried out for 96.0 hours. Therefore, 96.0 hours was considered as the optimum reaction time for the preparation of the 3D network polymer with an optimum yield of 76.0%.

## 6. Solid-state $^{15}\text{N}$ -NMR spectra of EDC and P5-P

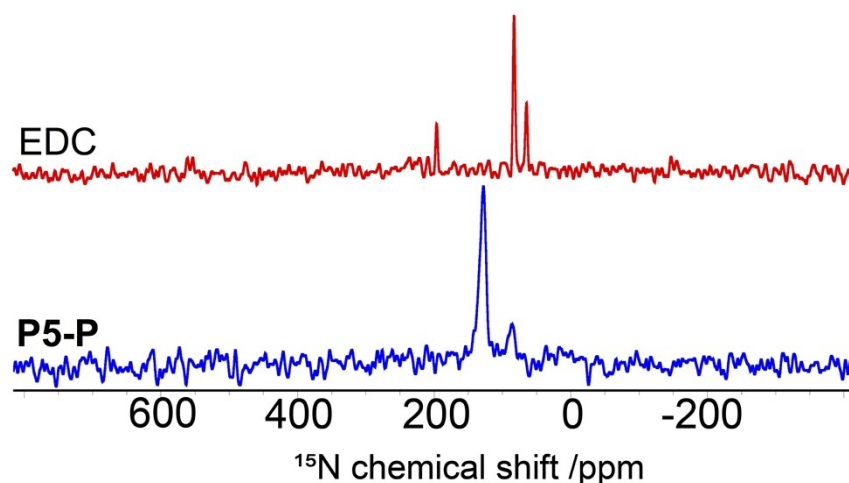

**Fig. S2**  $^{15}\text{N}$  CPMAS-NMR spectra of 1-(3-dimethylaminopropyl)-3-ethylcarbodiimide hydrochloride (EDC) (198.34, 85.07, 66.89 ppm) and **P5-P** (129.93, 88.26 ppm). The vanishing of the peak at 129.93 ppm of **P5-P** confirmed the rearrangement of EDC moiety in the polymer.

## 7. Proposed molecular structures of P5-P

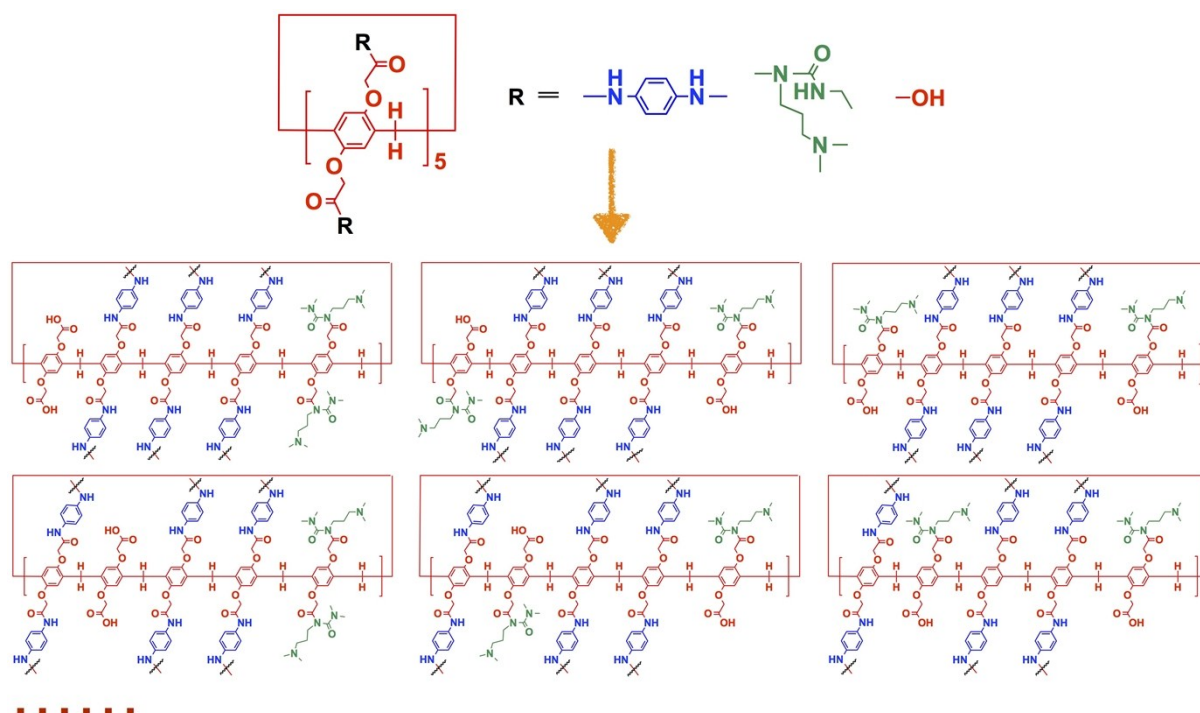

**Fig. S3** Proposed molecular structures of 3D network polymer **P5-P** crosslinked by the amidation reaction between **PPD** and **P5**. The **PPD**:**P5** molar ratio is 3.00:1.00 and **EDC**:**P5** molar ratio is 2.00:1.00.

## 8. Porosity and surface area measurements for P5-P

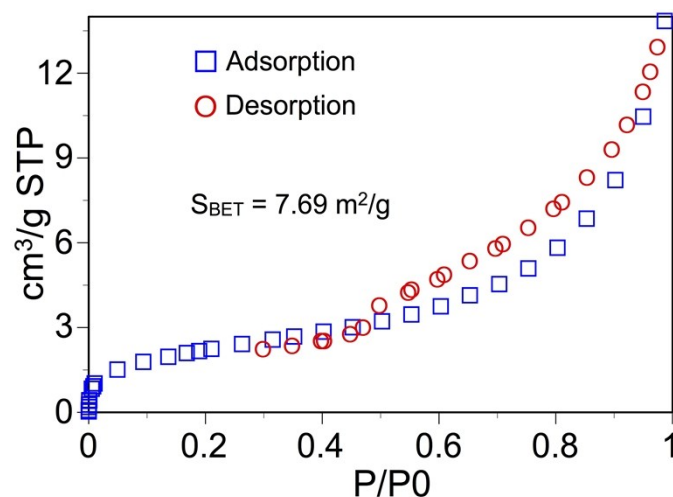

**Fig. S4**  $N_2$  sorption isotherm (77.0 K) and surface area data analysis of polymer **P5-P**.

## 9. Water regain analysis

| $W_d$   | $W_w$   | Water regain |
|---------|---------|--------------|
| 3.95 mg | 6.85 mg | 73.4%        |
| 3.96 mg | 6.83 mg | 72.3%        |
| 3.90 mg | 6.88 mg | 76.4%        |

**Table S2** Water regain analysis of polymer **P5-P**. The water regain (expressed as weight percent) of the polymer **P5-P** was determined from the average (74.0%) of three measurements.

## 10. Adsorption of different pollutants

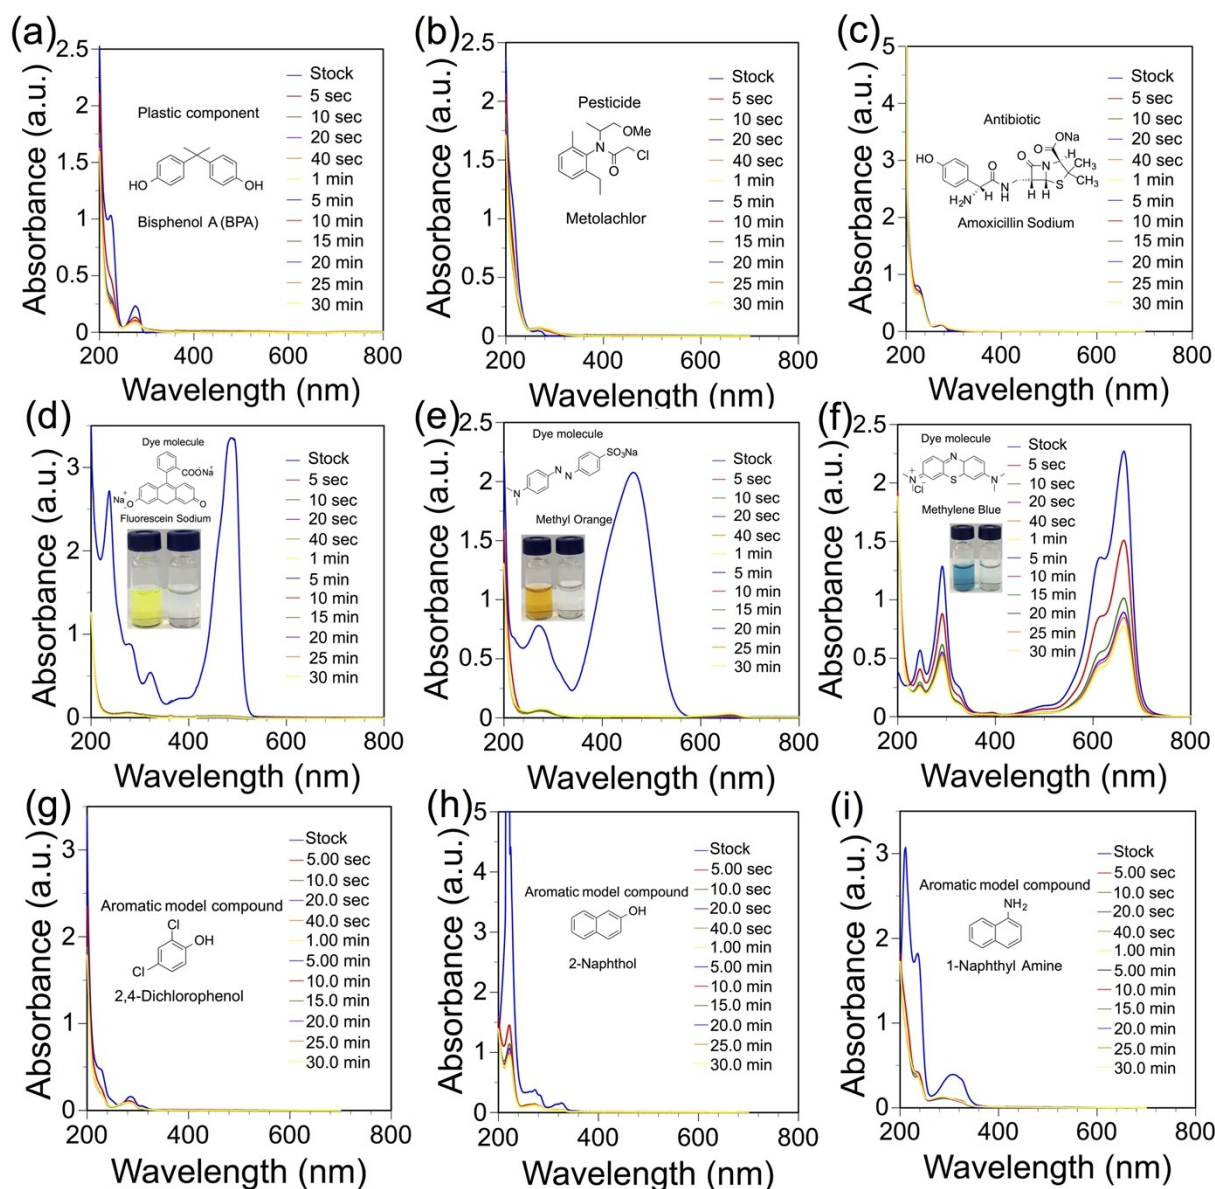

**Fig. S5** UV-vis spectra recorded as a function of contact times with **P5-P** (1.00 mg/mL): (a) bisphenol A (0.100 mM), (b) metolachlor (0.100 mM), (c) amoxicillin sodium (0.100 mM), (d) fluorescein sodium (0.100 mM), insert: photographs of the 0.100 mM aqueous solutions of fluorescein sodium before and after the adsorption by **P5-P**, (e) methyl orange (0.100 mM), insert: photographs of the 0.100 mM aqueous solutions of methyl orange before and after the adsorption by **P5-P**, (f) methylene blue (0.100 mM), insert: photographs of the 0.100 mM aqueous solutions of methylene blue before and after the adsorption by **P5-P**, (g) 2,4-dichlorophenol (0.100 mM), (h) 2-naphthol (0.100 mM), and (i) 1-naphthyl amine (0.100 mM).



| Pollutant          | %Uptake in 10.0 sec | %Uptake at equilibrium |
|--------------------|---------------------|------------------------|
| Bisphenol A        | 53.9                | 62.1                   |
| Metolachlor        | 36.8                | 45.6                   |
| Amoxicillin Sodium | 14.8                | 17.0                   |
| Fluorescein Sodium | 99.8                | —                      |
| Methyl Orange      | 99.7                | —                      |
| Methylene Blue     | 46.8                | 65.0                   |
| 2,4-Dichlorophenol | 41.8                | 41.8                   |
| 2-Naphthol         | 65.1                | 67.2                   |
| 1-Naphthyl Amine   | 72.4                | 75.0                   |

**Table S3** Percentage removal efficiency after 10.0 sec and equilibrium removal efficiency of each pollutant adsorbed by **P5-P**. The adsorption is almost reaching equilibrium uptake in the early stages of the adsorption process (within 10.0 sec).

| Pollutant                       | Equilibrium time |
|---------------------------------|------------------|
| Bisphenol A                     | 1.00 min         |
| Metolachlor                     | 40.0 sec         |
| Amoxicillin Sodium              | 20.0 sec         |
| Fluorescein Sodium <sup>a</sup> | 1.00 min         |
| Methyl Orange <sup>a</sup>      | 1.00 min         |
| Methylene Blue                  | 1.00 min         |
| 2,4-Dichlorophenol              | 10.0 sec         |
| 2-Naphthol                      | 1.00 min         |
| 1-Naphthyl Amine                | 1.00 min         |

**Table S4** The required contact time to reach equilibrium on the organic micropollutants adsorptions. <sup>a</sup>The amount of the adsorbent used in this study is 0.100 mg/mL.

## 11. Adsorption data of fluorescein sodium and methyl orange

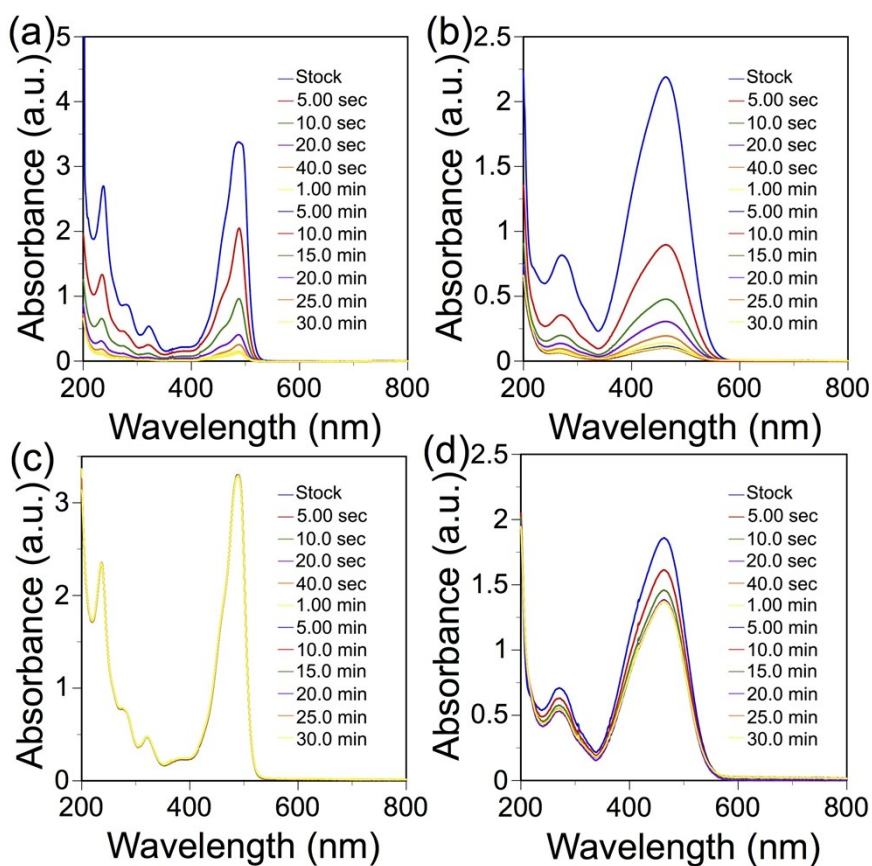

**Fig. S6** UV-vis spectra recorded as a function of contact times of (a) fluorescein sodium and (b) methyl orange with **P5-P** (0.100 mg/mL); UV-vis spectra recorded as a function of contact times of (c) fluorescein sodium and (d) methyl orange with activated carbon (0.100 mg/mL).



## 12. Pseudo-second-order model

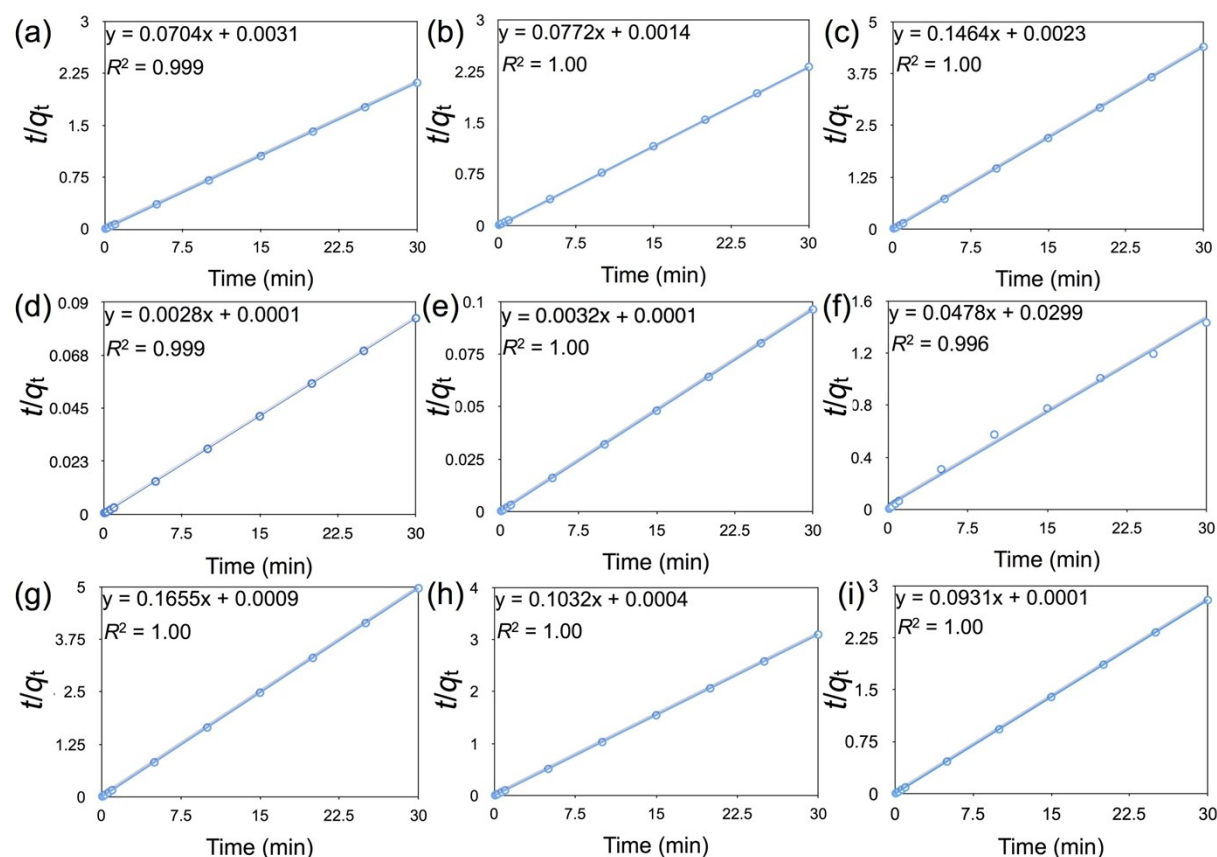

**Fig. S7** Pseudo-second-order plots for **P5-P**: (a) bisphenol A, (b) metolachlor, (c) amoxicillin sodium, (d) fluorescein sodium, (e) methyl orange, (f) methylene blue, (g) 2,4-dichlorophenol, (h) 2-naphthol, and (i) 1-naphthyl amine. Here  $t$  (in min) is the contact time of each pollutant solution with **P5-P** and  $q_t$  (in mg/g) is the amount of each pollutant adsorbed per gram of **P5-P**.

| Pollutant                       | $K_{\text{obs}}$ (mg/g min) | $R^2$ |
|---------------------------------|-----------------------------|-------|
| Bisphenol A                     | 0.160                       | 0.999 |
| Metolachlor                     | 4.26                        | 1.00  |
| Amoxicillin Sodium              | 9.32                        | 1.00  |
| Fluorescein Sodium <sup>a</sup> | 0.078                       | 0.999 |
| Methyl Orange <sup>a</sup>      | 0.102                       | 1.00  |
| Methylene Blue                  | 0.076                       | 0.996 |
| 2,4-Dichlorophenol              | 3.04                        | 1.00  |
| 2-Naphthol                      | 26.6                        | 1.00  |
| 1-Naphthyl Amine                | 87.3                        | 1.00  |

**Table S5** Rates of each pollutant uptake by **P5-P**. <sup>a</sup>The amount of the adsorbent used in this study is 0.100 mg/mL.

### 13. Fluorescein sodium and methyl orange maximum uptakes of P5-P and other adsorbents

| References                                       | Adsorbents                     | Fluorescein Sodium Uptake | References                                                       | Adsorbents                     | Methyl Orange Uptake |
|--------------------------------------------------|--------------------------------|---------------------------|------------------------------------------------------------------|--------------------------------|----------------------|
| <i>Langmuir</i> , 2000, <b>16</b> , 10351–10358. | Zn-Al-Hydrotalcite             | 0.270 mg/g                | <i>ACS Appl. Mater. Interfaces</i> , 2012, <b>4</b> , 5749–5760. | Carbon nanotube                | 149 mg/g             |
|                                                  |                                |                           | <i>J. Mater. Chem. A</i> 2015, <b>3</b> , 10031–10037.           | Graphene                       | 70.0 mg/g            |
| This work                                        | 3D network polymer <b>P5-P</b> | 2500 mg/g                 | This work                                                        | 3D network polymer <b>P5-P</b> | 909 mg/g             |

**Table S6** Maximum adsorption capacities of **P5-P** and previously reported adsorbents for fluorescein sodium and methyl orange. It should be noted that the adsorption materials for fluorescein sodium have rarely been reported.

### 14. P5-P regeneration tests by washing with water

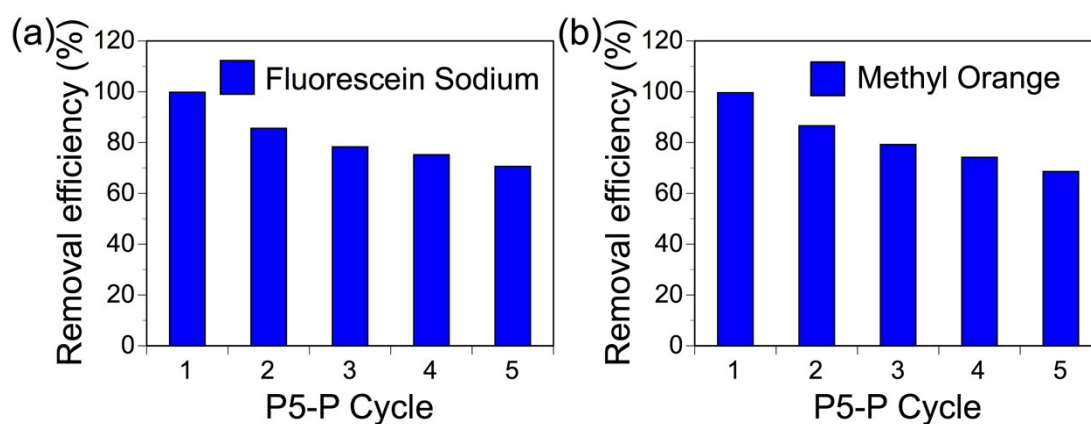

**Fig. S8** The regeneration cycles of **P5-P** after the adsorption of (a) fluorescein sodium and (b) methyl orange by washing with water at 65 °C.

## 15. Solid-state NMR results

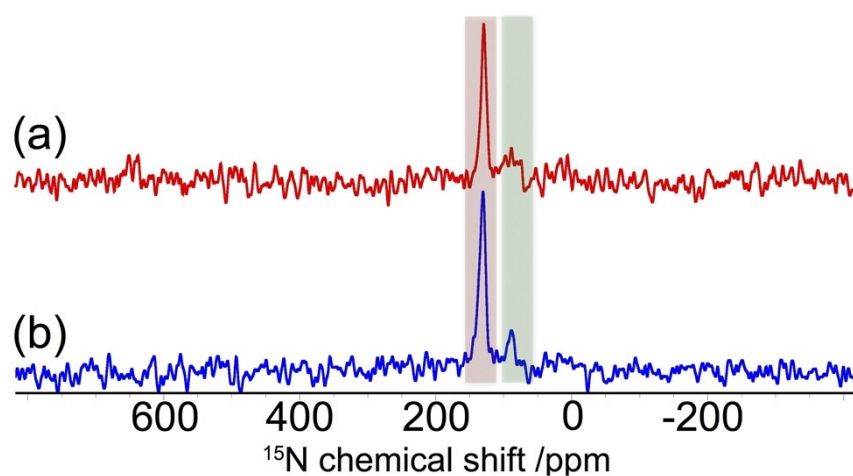

**Fig. S9** Solid-state  $^{15}\text{N}$ -NMR spectra of (a) fluorescein sodium adsorbed polymer **P5-P** and (b) **P5-P**.

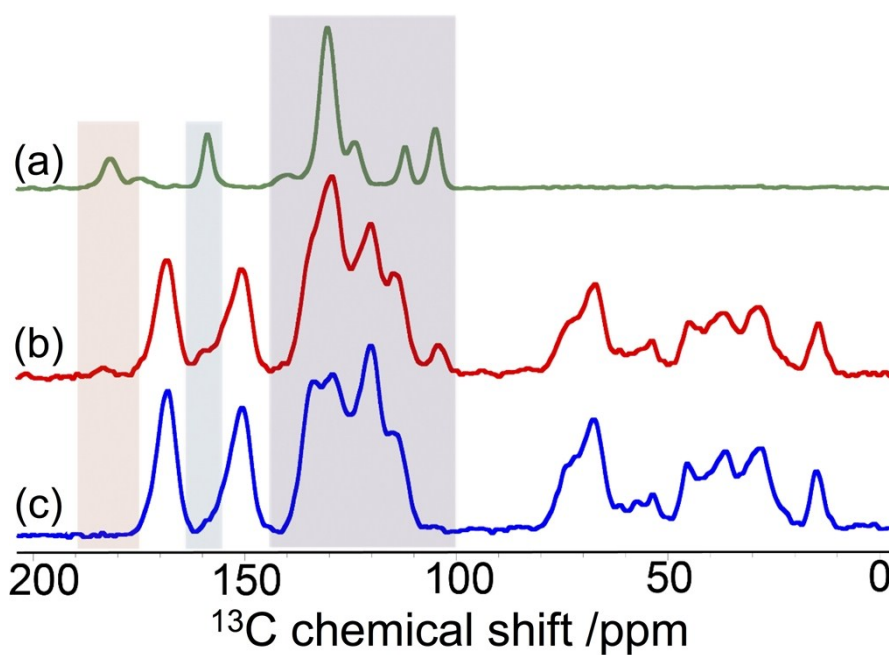

**Fig. S10** Solid-state  $^{13}\text{C}$ -NMR spectra of (a) fluorescein sodium, (b) fluorescein sodium adsorbed polymer **P5-P**, and (c) **P5-P**. The peak at 104.22 ppm in (b) can be easily distinguished to the carbon of fluorescein sodium.

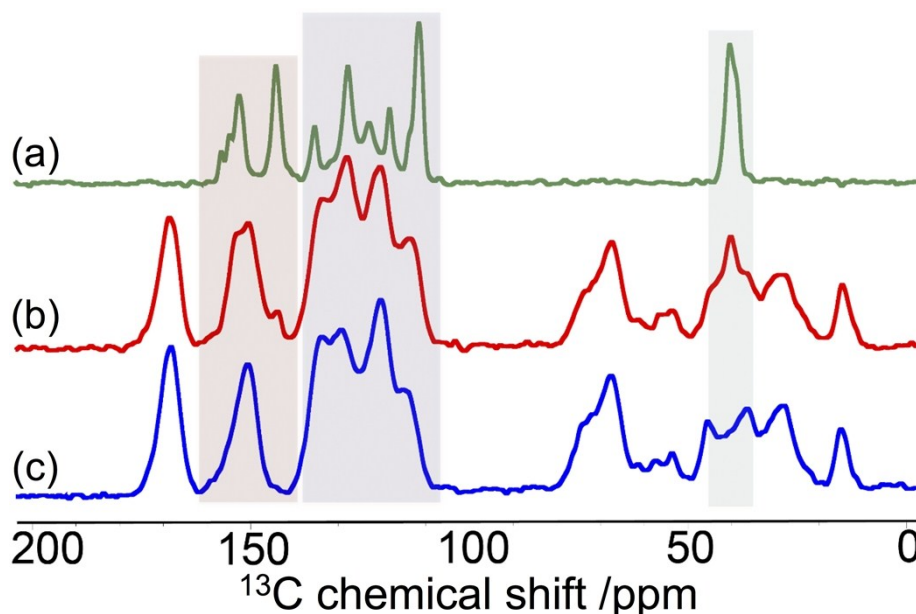

**Fig. S11** Solid-state  $^{13}\text{C}$ -NMR spectra of (a) methyl orange, (b) methyl orange adsorbed polymer **P5-P**, and (c) **P5-P**. The peak at 40.07 ppm was enhanced after methyl orange was absorbed into **P5-P**.

#### 16. Adsorption of fluorescein sodium and methyl orange at different pH values

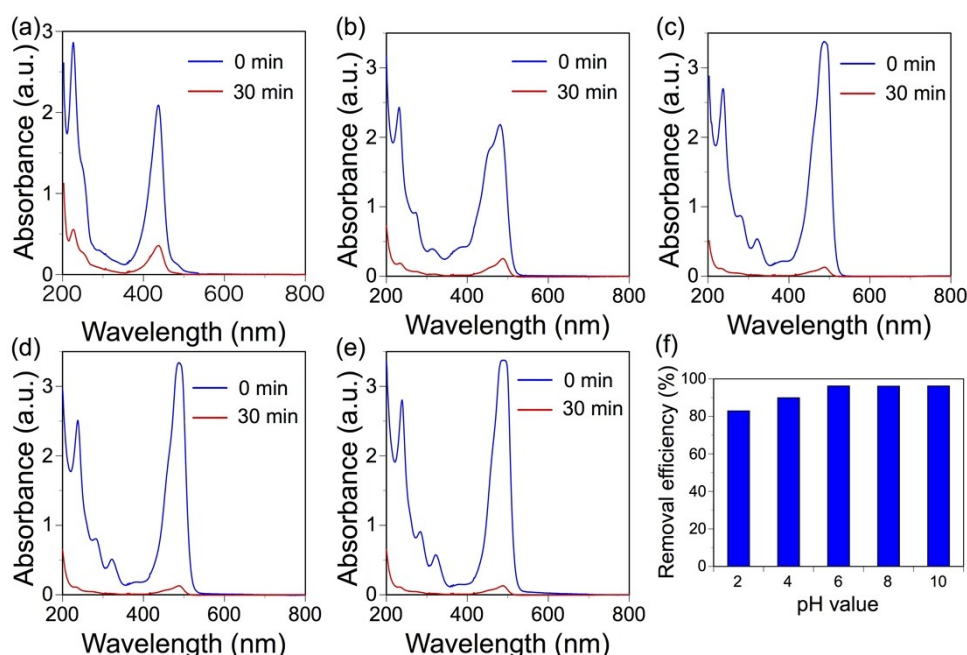

**Fig. S12** UV-vis spectra of fluorescein sodium recorded as a function of contact times with **P5-P** at different pH values (0.100 mg/mL): (a) pH = 2.00, (b) pH = 4.00, (c) pH = 6.00, (d) pH = 8.00, (e) pH = 10.0. (f) Percentage removal efficiency of fluorescein sodium by **P5-P** determined after the contact time of 30.0 min at different pH values.

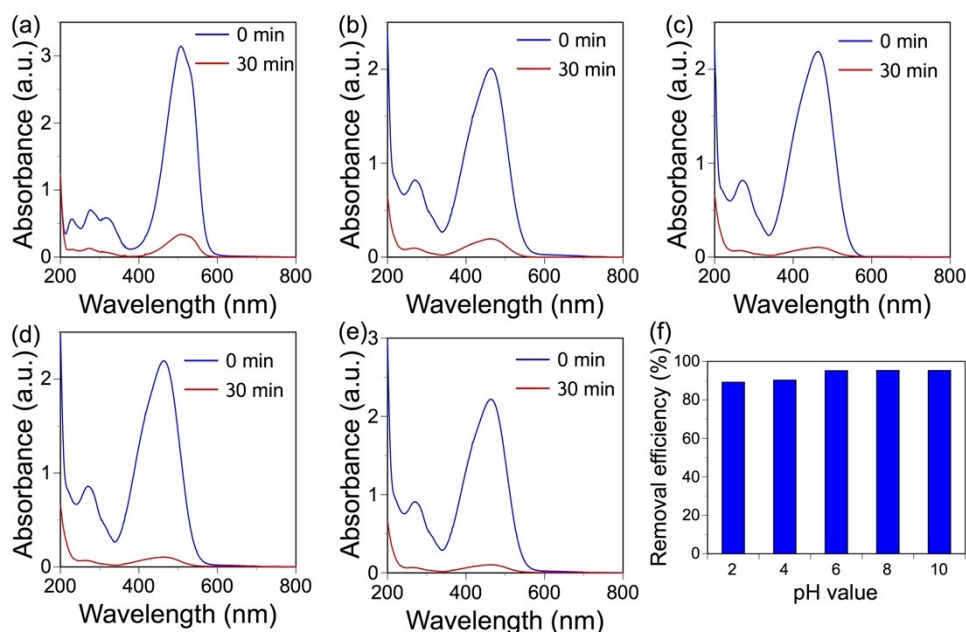

**Fig. S13** UV-vis spectra of methyl orange recorded as a function of contact times with **P5-P** at different pH values (0.100 mg/mL): (a) pH = 2.00, (b) pH = 4.00, (c) pH = 6.00, (d) pH = 8.00, (e) pH = 10.0. (f) Percentage removal efficiency of methyl orange by **P5-P** determined after the contact time of 30.0 min at different pH values.

## 17. Solid-state 2D $^{13}\text{C}$ - $^1\text{H}$ HETCOR MAS results

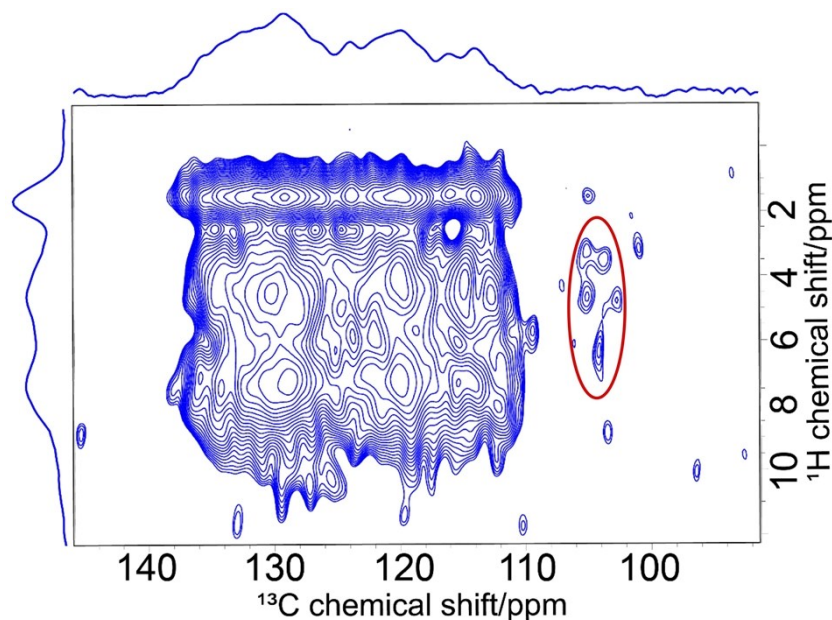

**Fig. S14** Solid-state 2D  $^{13}\text{C}$ - $^1\text{H}$  HETCOR MAS spectrum of fluorescein sodium adsorbed polymer **P5-P** with a mixing time of 10 ms. The spectra exhibit the characteristic carbon signal of fluorescein sodium at 104.22 ppm are slightly correlated to the proton signal at 3.18–4.35 ppm which are assigned to the  $-\text{CH}_2$  groups in the polymer **P5-P** (the signals are labeled).

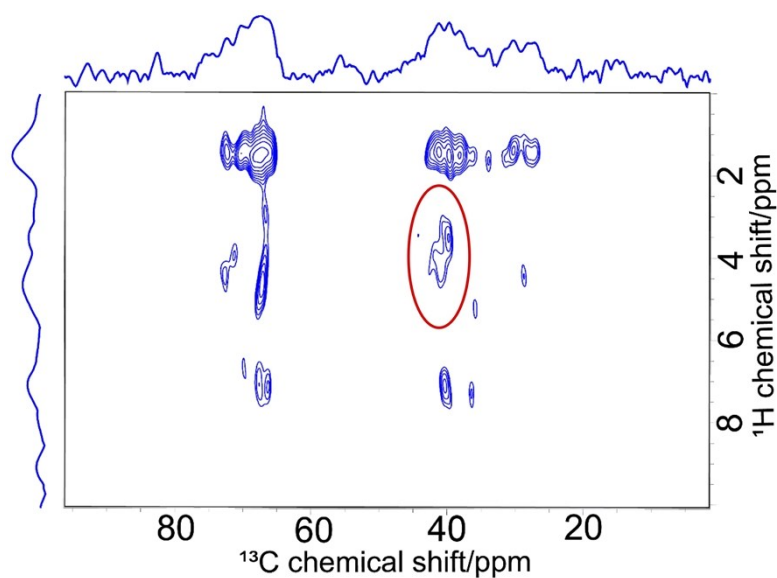

**Fig. S15** Solid-state 2D  $^{13}\text{C}$ – $^1\text{H}$  correlation spectra of methyl orange adsorbed polymer **P5-P** with a mixing time of 10 ms. The labeled signal shows that the carbon signal at 40.07 ppm assigned to the methyl group of methyl orange also correlated to the identified proton signal at 3.18–4.35 ppm of **P5-P**.

#### 18. Photos of the polymer **P5-P** after dispersion in water

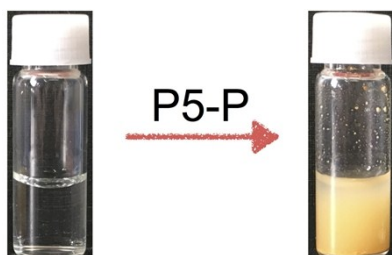

**Fig. S16** **P5-P** swelled after dispersion in water.
